# Supplementary material for: Structural and compositional study of precipitates in under-aged Cu-added Al-Mg-Si alloy
Source: PubMed Central journal article supplement (PMC6226491; doi:10.1038/s41598-018-35134-8), 2018-11-09
Supplement: 41598_2018_35134_MOESM1_ESM.pdf [file 41598_2018_35134_MOESM1_ESM.pdf]

## Supplementary Information

### **Structural and compositional study of precipitates in under-aged Cu-added Al-Mg-Si alloy**

Takuya Maeda<sup>1\*</sup>, Kenji Kaneko<sup>1</sup>, Takuya Namba<sup>1</sup>, Yuki Koshino<sup>1, 2</sup>, Yukio Sato<sup>1</sup>, Ryo Teranishi<sup>1</sup>, and Yasuhiro Aruga<sup>2</sup>

<sup>1</sup> Department of Materials Science and Engineering, Kyushu University, 744, Motoooka, Nishi, Fukuoka 819-0395, Japan

<sup>2</sup> Materials Research Laboratory, Kobe Steel, Ltd., 1-5-5, Takatsukadai, Nishi, Kobe 651-2271, Japan

\* corresponding author

E-mail: maeda7188@gmail.com

Tel/Fax: +81-92-802-2979

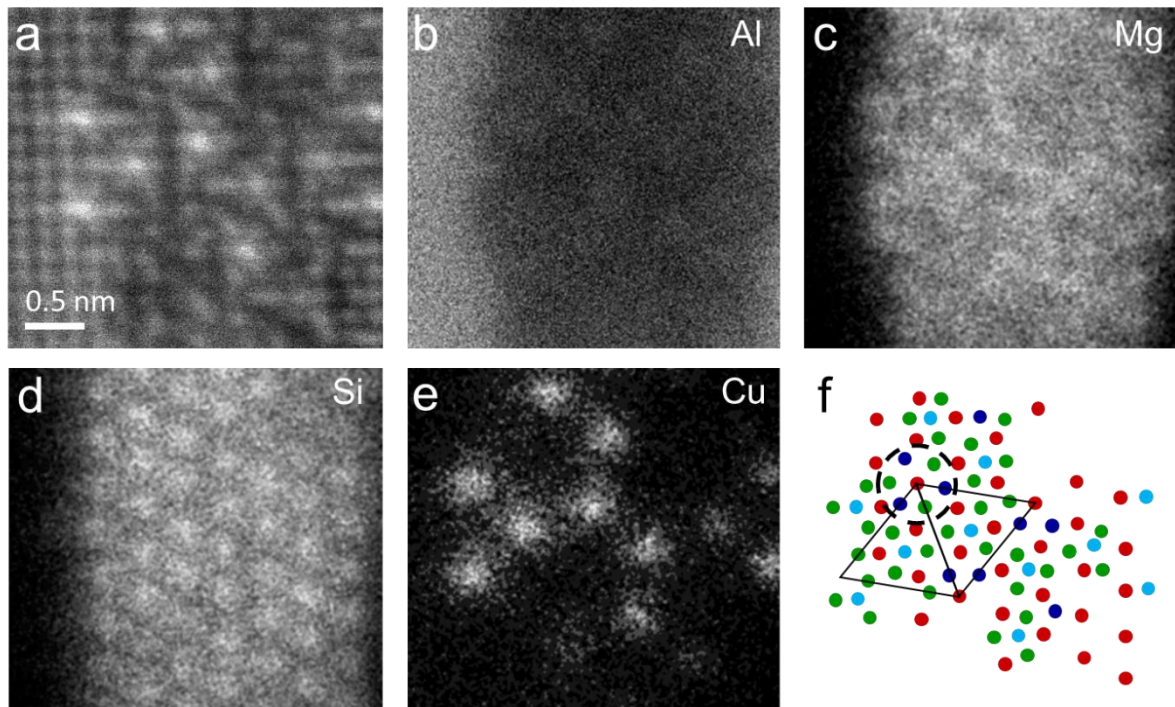

Supplement figure 1. Atommally-resolved HAADF-STEM image and EDS maps of the disordered Q' phase in under-aged 6016 alloy. (a) shows HAADF-STEM image. (b-e) shows chemical map of Al, Mg, Si, and Cu, respectively. (f) shows schematic drawing of proposed Q' structure from the EDS results. Color codes are as follows: blue = Al, green = Mg, red = Si, and Cu = light blue, respectively. Dotted circle indicates three-symmetric Al occupied sites. The composition of Q' can be estimated as  $\text{Al}_3\text{Mg}_9\text{Si}_2\text{Cu}_7$ , as schematically drawn in supplement figure 1(f).
